# Supplementary material for: Mechanism of biochanin A alleviating PM2.5-induced oxidative damage based on an XRCC1 knockout BEAS-2B cell model
Source: Royal Society of Chemistry journal article supplement (doi:10.1039/d1fo04312a), 2022-01-01
Supplement: d1fo04312a1.pdf [file d1fo04312a1.pdf]

**Tab. S1** Primer sequences of genes

| <b>Genes</b>     | <b>Forward primer (5' to 3') (bp)</b> | <b>Reverse primer (5' to 3') (bp)</b> |
|------------------|---------------------------------------|---------------------------------------|
| <i>GAPDH</i>     | GGACCTGACCTGCCGTCTAG                  | GTAGCCCAGGATGCCCTTGA                  |
| <i>OGG1</i>      | ATTCCAAGGTGTGCGACTGCTG                | GATGCGGGCGATGTTGTTGTTG                |
| <i>XRCC1</i>     | CAAGGCAGGCGAGAAGACCATC                | CACCAGCACCTCCACGAAAGC                 |
| <i>ERCC1</i>     | CCTACGCCGAATATGCCATCTCAC              | CCGAGGGCTCACAATGATGCTG                |
| <i>PCNA</i>      | GAAGGTGTTGGAGGCACTCAAGG               | GCAGCGGTAGGTGTCTGAAGC                 |
| <i>PARP1</i>     | AGGGCAGCAGCGACTCTCAG                  | TCCAGCAGGTTGTCAAGCATTTC               |
| <i>APE1</i>      | CTGCCCCACCTCTTGATTGC                  | GATCATGCTCCTCCTCGCCT                  |
| <i>MTH1</i>      | CAGATCGTGTTTGAGTTCGTG                 | AGTACCCGTGGAATTTCTTCTT                |
| <i>p53</i>       | GGAGCACTAAGCGAGCACTGTC                | GCCTCATTGAGCTCTCGGAACATC              |
| <i>DNA pol-β</i> | AGTCCCTGGTTCTGAACACTCTGG              | TTCTGTGAGCATGTCGGTGATTCC              |

**Tab.S2** Target site sequence

| <b>Name</b> | <b>Sequence (5'-3')</b> |
|-------------|-------------------------|
| XRCC1-gRNA1 | TCTCCGGCATGTCAACGTCGTGG |
| XRCC1-gRNA2 | GGCTGCTGCAGGACACGACATGG |
| XRCC1-gRNA3 | ACTCGGTGAGGGACCTGCATGGG |

**Tab.S3** Experimental primer sequence

| <b>Name</b>     | <b>Primer</b> | <b>Sequence (5'-3')</b>   |
|-----------------|---------------|---------------------------|
| sgRNA#1 (XRCC1) | Forward       | CACCGTCTCCGGCATGTCAACGTCG |
|                 | Reverse       | AAACCGACGTTGACATGCCGGAGAC |
| sgRNA#2 (XRCC1) | Forward       | CACCGGCTGCTGCAGGACACGACA  |
|                 | Reverse       | AAACTGTCTGTCTCCTGCAGCAGCC |
| sgRNA#3 (XRCC1) | Forward       | CACCGACTCGGTGAGGGACCTGCAT |
|                 | Reverse       | AAACATGCAGGTCCCTCACCGAGTC |

**Fig.S1 Electricity Transfer Conditions results of BEAS-2B cell.**

(A-B) 550V, 30ms, 1pulse under Visible light and fluorescence respectively;  
(C-D) 600V, 30ms, 1pulse under Visible light and fluorescence respectively;  
(E-F) 650V, 30ms, 1pulse under Visible light and fluorescence respectively.

Tab. S4 Clone knockout results

| Clone name            | Sequence length | Deletion sequence                                                          |
|-----------------------|-----------------|----------------------------------------------------------------------------|
| 21 <sup>#</sup> clone | 70bp            | CGTTGACATGCCGGAGATCCGCCTCCGCCATGTCG<br>TGTCCTGCAGCAGCCAGGACTCGGTGAGGGACCTG |
|                       | 68bp            | TTGACATGCCGGAGATCCGCCTCCGCCATGTCGTG<br>TCCTGCAGCAGCCAGGACTCGGTGAGGGACCTG   |
| 38 <sup>#</sup> clone | 70bp            | GTTGACATGCCGGAGATCCGCCTCCGCCATGTCGT<br>GTCCTGCAGCAGCCAGGACTCGGTGAGGGACCTGC |
|                       | 70bp            | GTTGACATGCCGGAGATCCGCCTCCGCCATGTCGT<br>GTCCTGCAGCAGCCAGGACTCGGTGAGGGACCTGC |

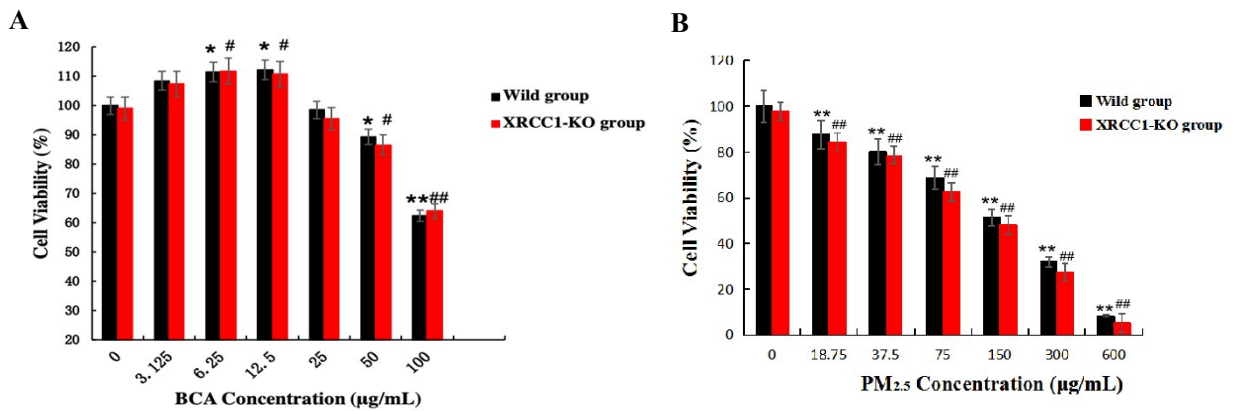

**Fig. S2 Preliminary study on the establishment of PM<sub>2.5</sub> exposure-BCA protective cell model in vitro.** (A) Evaluation of PM<sub>2.5</sub>-induced cytotoxicity. The concentration gradient of PM<sub>2.5</sub> was 600 μg/mL, 300 μg/mL, 150 μg/mL, 75 μg/mL, 37.5 μg/mL, 18.75 μg/mL. BEAS-2B and XRCC1-KO cells were exposed for 24 h, and the optimal concentration was determined by CCK-8 method. The IC<sub>50</sub> values of PM<sub>2.5</sub> were 152.47 μg/mL in WT group and 147.50 μg/mL in KO group. For convenience, PM<sub>2.5</sub> damage model was constructed with 150 μg/mL as the concentration of PM<sub>2.5</sub>. (B) Evaluation of BCA cytotoxicity. The concentration gradient of BCA was 100 μg/mL, 50 μg/mL, 25 μg/mL, 12.5 μg/mL, 6.25 μg/mL, 3.125 μg/mL. BEAS-2B and XRCC1-KO cells were exposed for 24 h, and the optimal concentration was determined by CCK-8 method. The results indicated that the safe dose range of BCA was 0-50 μg/mL, which were used for the subsequent in vitro model construction.
